# Supplementary material for: Contribution of Intestinal Barrier Damage, Microbial Translocation and HIV-1 Infection Status to an Inflammaging Signature
Source: PLoS One. 2014 May 12;9(5):e97171. doi: 10.1371/journal.pone.0097171 (PMC4018269; doi:10.1371/journal.pone.0097171)
Supplement: Table S2 — Regression Summary Tables. (XLSX) [file pone.0097171.s005.xlsx]

## Sheet: Sheet1
		Regression Summary Tables
			iFABP		LPS		sCD14		sCD27		hsCRP		IL6
			Estimate	p value	Estimate	p value	Estimate	p value	Estimate	p value	Estimate	p value	Estimate	p value
		Age	0.00049	0.9342	0.00965	0.0601	0.00101	0.6094	0.011	0.0009	0.01806	0.0274	0.02594	<0.0001
		CD4	0.03844	0.8012	-0.00248	0.9854	-0.03511	0.498	-0.1072	0.2607	-0.12596	0.5542	-0.0659	0.6712
